# Supplementary figures and images for: White zein colloidal particles: synthesis and characterization of their optical properties on the single particle level and in concentrated suspensions
Source: Royal Society of Chemistry journal article supplement (doi:10.1039/c7sm02415k), 2018-01-01

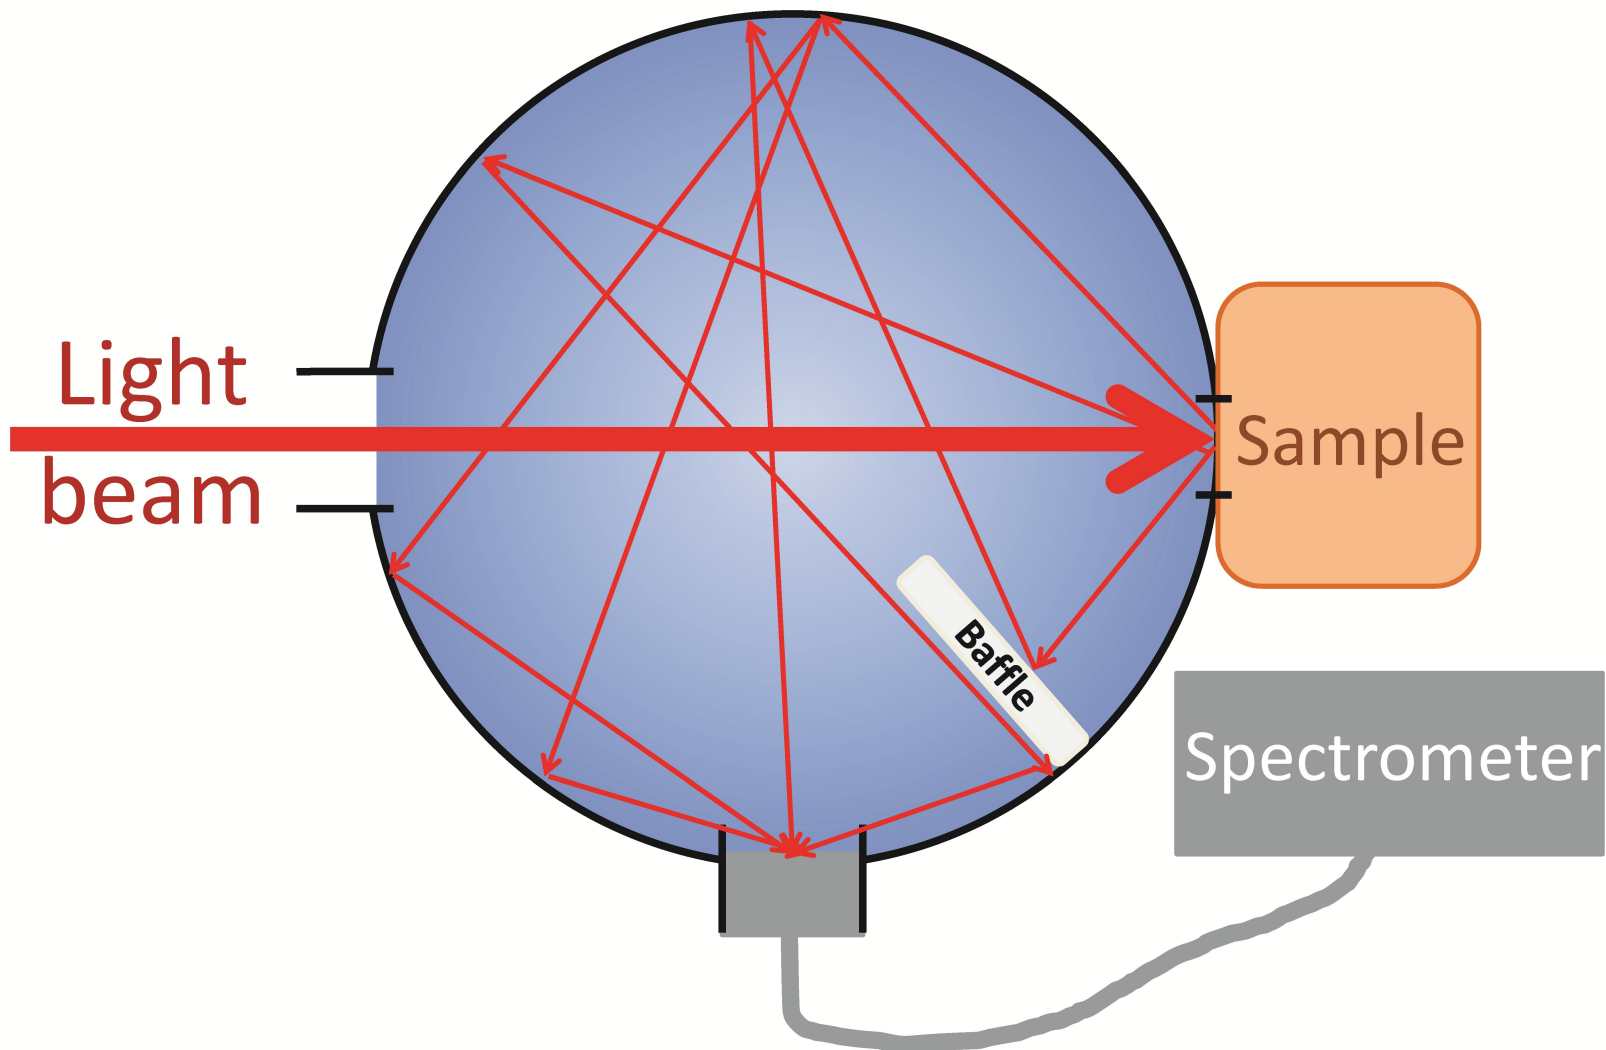

Supplement: c7sm02415k2.pdf [file c7sm02415k2.pdf]

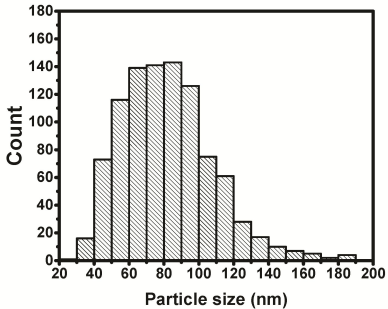

Supplement: c7sm02415k4.pdf [file c7sm02415k4.pdf]

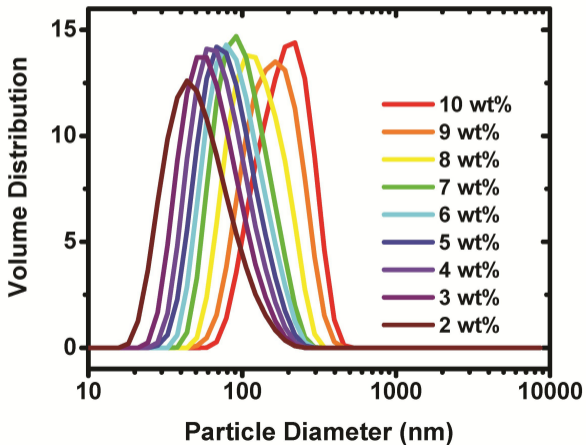

Supplement: c7sm02415k6.pdf [file c7sm02415k6.pdf]

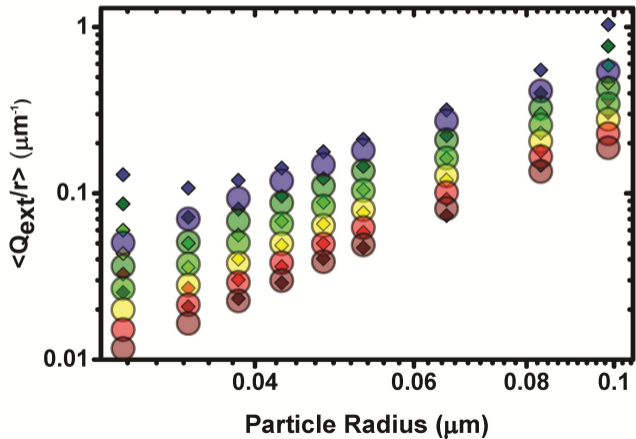

Supplement: c7sm02415k7.pdf [file c7sm02415k7.pdf]

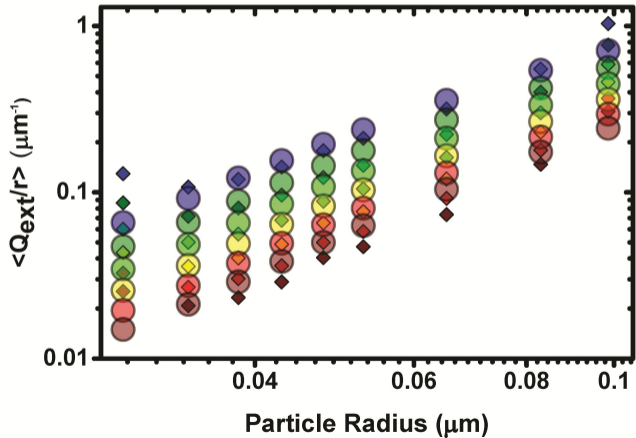

Supplement: c7sm02415k8.pdf [file c7sm02415k8.pdf]
